# Supplementary material for: Fabrication of a lead ion selective membrane based on a polycarbazole Sn(iv) arsenotungstate nanocomposite and its ion exchange membrane (IEM) kinetic studies
Source: Royal Society of Chemistry journal article supplement (doi:10.1039/d0ra07534e), 2021-01-01
Supplement: d0ra07534e1.pdf [file d0ra07534e1.pdf]

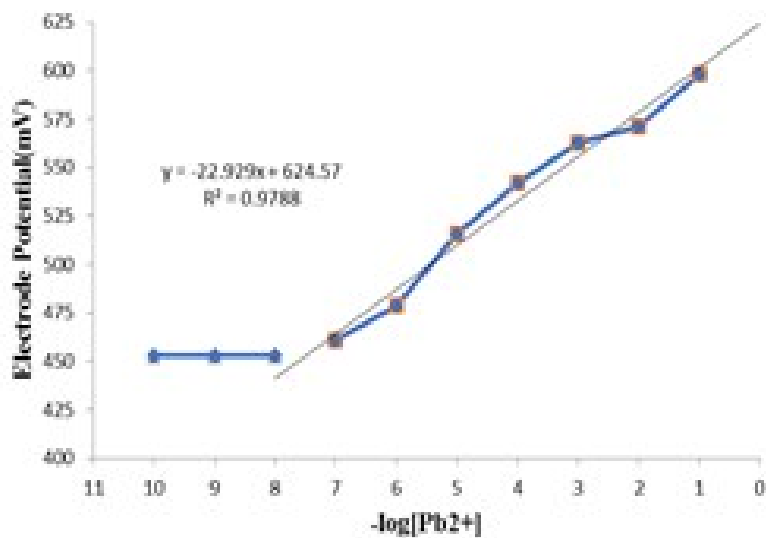

**Fig S1.** Calibration curve of Pcz-SnAT composite membrane electrode in  $\text{Pb}(\text{NO}_3)_2$  with Nerstian value of linear working range of calibration plot

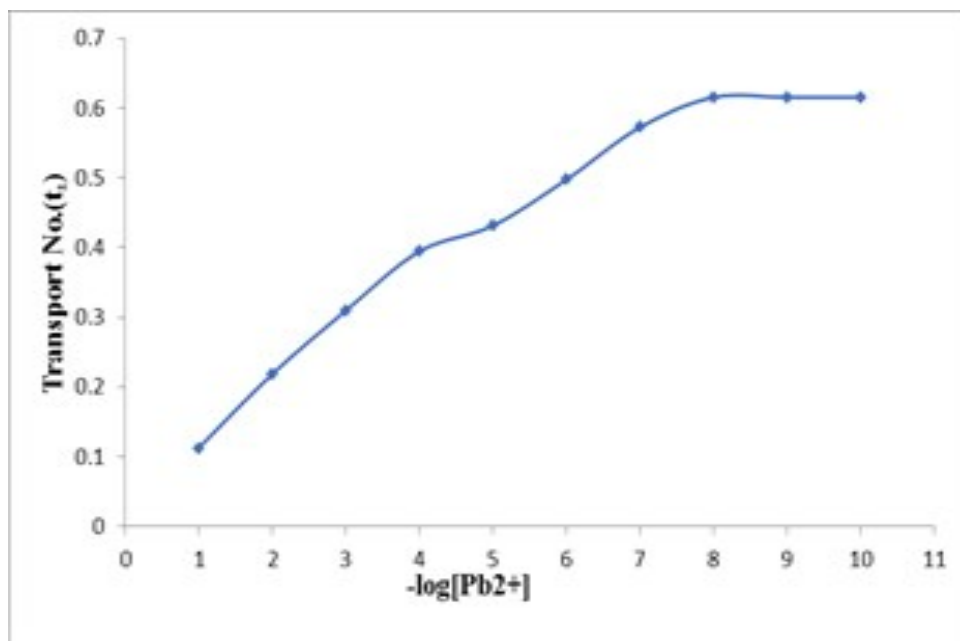

**Fig S2.** Graph of fabricated composite membrane electrode in  $\text{Pb}(\text{NO}_3)_2$  solution for transport no.

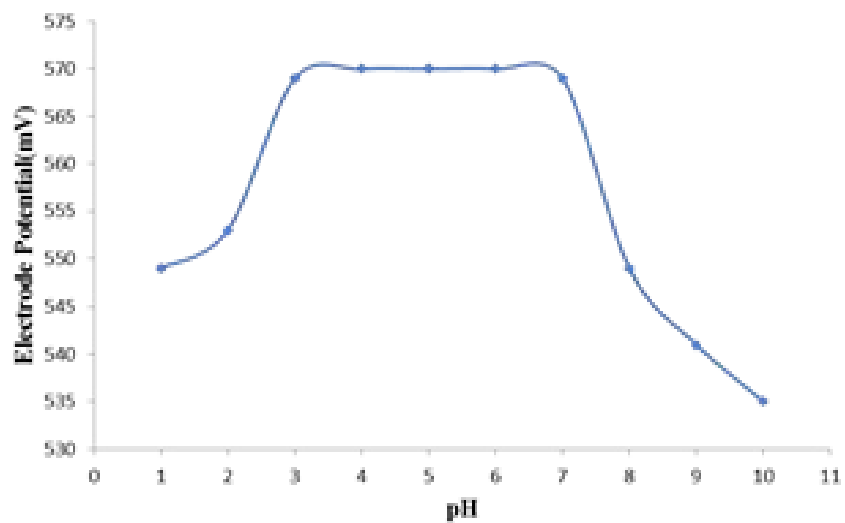

**Fig S3.** Effect of pH on the potential response of the Pcz-SnAT composite ion exchange membrane electrode

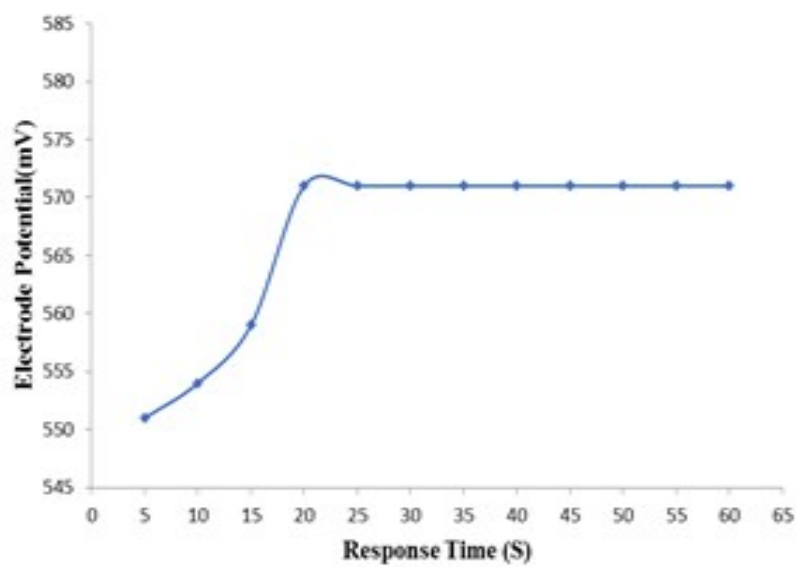

**Fig S4.** Time response graph of composite electrode of IEM at  $1 \times 10^{-1}$  mol/L  $[Pb^{2+}]$ .

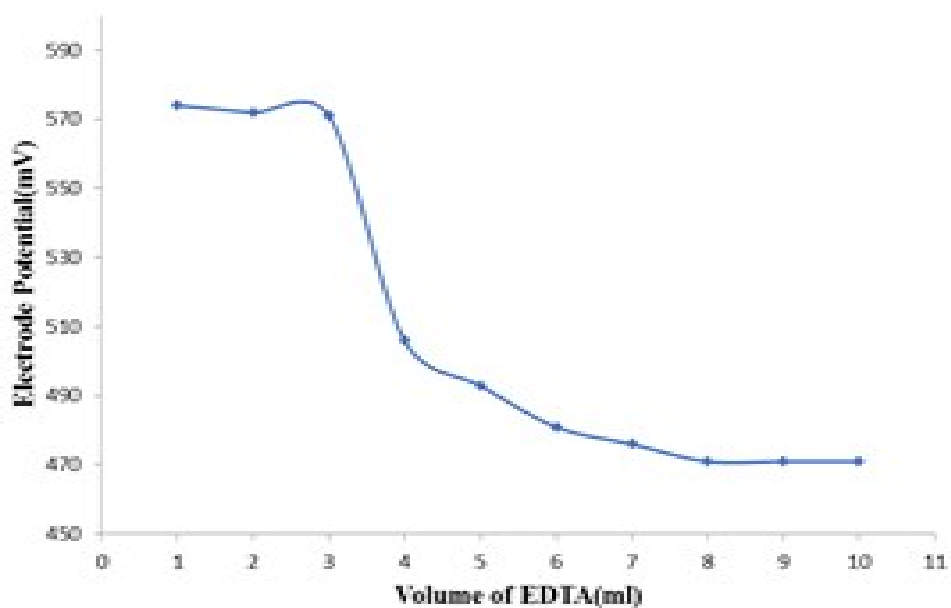

**Fig S5.** The titration of Pcz-SnAT composite electrode of IEM at  $1 \times 10^{-2}$  mol/L  $[Pb^{2+}]$ .

**Table S1** Synthesis and IEC of Sn(IV) arsenotungstate IEM

| S. No. | 0.1 mol/L<br>Stannic chloride<br>1 mol/L HCl/mL | 0.1 mol/L<br>Sodium tungstate<br>DMW/mL | 0.1 mol/L<br>Sodium arsenate<br>DMW/mL | pH | IEC<br>Meqg <sup>-1</sup> |
|--------|-------------------------------------------------|-----------------------------------------|----------------------------------------|----|---------------------------|
| S-1    | 50                                              | 50                                      | 50                                     | 1  | 2.0                       |
| S-2    | 100                                             | 50                                      | 50                                     | 1  | 2.1                       |
| S-3    | 50                                              | 100                                     | 50                                     | 1  | 1.4                       |
| S-4    | 50                                              | 50                                      | 100                                    | 1  | 0.8                       |

**Table S2** Preparation, IEC of Pcz-SnAT nanocomposite cation exchanger

| S.No. | Sn(IV)arsenotungstate<br>Inorganic ion exchanger<br>(chloroform)<br>(gm) | Carbazol<br>(chloroform)<br>(gm) | FeCl <sub>3</sub><br>(chloroform)<br>(gm) | IEC<br>meq/gm |
|-------|--------------------------------------------------------------------------|----------------------------------|-------------------------------------------|---------------|
| P1    | 0.5                                                                      | 5                                | 5                                         | 1.30          |
| P2    | 1                                                                        | 5                                | 5                                         | 1.50          |
| P3    | 1.5                                                                      | 5                                | 5                                         | 1.80          |
| P4    | 2                                                                        | 5                                | 5                                         | 2.20          |
| P5    | 2.5                                                                      | 5                                | 5                                         | 1.70          |

**Table S3** Condition of preparation and IEC of Pcz-SnAT IEM

| Sample Code | composites (gm/L) | Binder                          |        | Stirring time (hours) | IEC of membrane (Meqg <sup>-1</sup> ) |
|-------------|-------------------|---------------------------------|--------|-----------------------|---------------------------------------|
|             |                   | Poly vinyl chloride (PVC)(gm/L) | THF/mL |                       |                                       |
| M1          | 0.25              | 0.2                             | 25     | 48                    | 0.48                                  |
| M2          | 0.50              | 0.2                             | 25     | 48                    | 0.37                                  |
| M3          | 0.75              | 0.2                             | 25     | 48                    | 0.95                                  |
| M4          | 1.0               | 0.2                             | 25     | 48                    | 0.62                                  |

**Table S4** Percentage composition of Pcz-SnAT composite IEM

| S. No. | Elements | Percentage % |                                        |
|--------|----------|--------------|----------------------------------------|
|        |          | Pcz-SnAT IEM | Pb <sup>2+</sup> adsorbed Pcz-SnAT IEM |
| 1      | C        | 39.21        | 46.34                                  |
| 2      | N        | 8.67         | 10.57                                  |
| 3      | O        | 27.24        | 21.24                                  |
| 4      | Fe       | 1.23         | 1.04                                   |
| 5      | Sn       | 14.21        | 10.03                                  |
| 6      | As       | 6.12         | 5.10                                   |

|   |    |      |      |
|---|----|------|------|
| 7 | W  | 3.24 | 3.54 |
| 8 | Pb | -    | 2.13 |

**Table S5** The selectivity coefficient of different interfering metal ions for Pb<sup>2+</sup>selective Pcz-SnAT composite CEM

| Interfering ions ( mol/L <sup>n+</sup> ) | Selectivity coefficients (K <sub>M<sub>SM</sub></sub> ) |
|------------------------------------------|---------------------------------------------------------|
| Pb <sup>2+</sup>                         | 1                                                       |
| Ni <sup>2+</sup>                         | 1.17×10 <sup>-2</sup>                                   |
| Cu <sup>2+</sup>                         | 1.3×10 <sup>-2</sup>                                    |
| Hg <sup>2+</sup>                         | 1.41×10 <sup>-2</sup>                                   |
| Cd <sup>2+</sup>                         | 1.8×10 <sup>-2</sup>                                    |
| Ba <sup>2+</sup>                         | 1.9×10 <sup>-2</sup>                                    |
| Mg <sup>2+</sup>                         | 1.96×10 <sup>-2</sup>                                   |

**Table S6** Slopes of different  $\tau$  vs t graph on Pcz-SnAT composite IEM at 40,60 and 80°C temperatures

| Metal ion | 10 <sup>-3</sup> S (s <sup>-1</sup> ) |      |      |
|-----------|---------------------------------------|------|------|
|           | 40°C                                  | 60°C | 80°C |
| Pb(II)    | 1.36                                  | 1.65 | 2.03 |

**Table S7** Values of  $D_o$ ,  $E_a$  and  $\Delta S^\circ$  for the exchange of  $H^+$  ion with lead ions on Pcz-SnAT

| Metal ion(<br>$Pb^{2+}$ )<br>exchange<br>with $H^+$ | $10^{-9}$ Ionic mobility<br>( $m^2V^{-1}s^{-1}$ ) | $10^3$ ionic radii<br>(nm) | $10^{10} D_o$ ( $m^2$<br>$s^{-1}$ ) | $10^{-3} E_a$<br>( $k Jmol^{-1}$ ) | $\Delta S^\circ$<br>( $J K^{-1} mol^{-1}$ ) | $\Delta H^\circ$<br>( $kJ mol^{-1} K^{-1}$ ) | $\Delta G^\circ$<br>( $kJ mol^{-1} K^{-1}$ ) |
|-----------------------------------------------------|---------------------------------------------------|----------------------------|-------------------------------------|------------------------------------|---------------------------------------------|----------------------------------------------|----------------------------------------------|
| Pb(II)                                              | 38.4                                              | 12.74                      | 8.04                                | 13.6                               | -141.8                                      | 2.62                                         | 39.37                                        |
| composite ion exchanger                             |                                                   |                            |                                     |                                    |                                             |                                              |                                              |
